# 1 **Chilean blind spots in soil biodiversity and ecosystem function research**

2

3 César Marín<sup>1\*</sup>, Javiera Rubio<sup>2</sup>, Roberto Godoy<sup>3</sup>

4

5 <sup>1</sup>Institute of Botany, The Czech Academy of Sciences, Zámek 1, 25243, Průhonice, Czech Republic.

6 <sup>2</sup>Escuela de Geografía, Facultad de Ciencias, Universidad Austral de Chile, Campus Isla Teja s/n,

7 5090000, Valdivia, Chile. <sup>3</sup>Instituto Ciencias Ambientales y Evolutivas, Facultad de Ciencias,

8 Universidad Austral de Chile, Campus Isla Teja s/n, 5090000, Valdivia, Chile.

9

10 **\*Corresponding author:** César Marín, E-mail: [cesar.marin@uoh.cl](mailto:cesar.marin@uoh.cl)

## 11 **Abstract**

12 Soil harbor up to a quarter of the world's biodiversity, contributing to many ecosystem functions. It is  
13 of great importance to identify distribution patterns of soil organisms and their ecosystem functions to  
14 support their conservation and policy building. This has been recently analyzed at macroecological  
15 scales, but analyses at national/local scales are scarce. Here we identify and analyze the blind spots in  
16 soil taxa and ecosystem functioning data in continental Chile, through a Web of Science articles (1945-  
17 2020) search, and focusing on ten soil taxonomic groups and four ecosystem functions (nutrient  
18 cycling, decomposition, water infiltration, soil respiration). A total of 741 sampling sites were obtained  
19 from 239 articles. In 49.25% of the sites soil biodiversity was studied, while this percentage was  
20 32.65% for ecosystem functions; in 18.10% of the sites both soil biodiversity and ecosystem functions  
21 were investigated at the same time, a surprisingly high percentage compared to global studies. By far,  
22 Bacteria/Fungi and nutrient cycling were the most investigated taxa and function, respectively. There is  
23 a significant number of soil taxa (Acari, Collembola, Nematoda, Formicoidea, Protista, Rotifera)  
24 represented by just a few sites concentrated in specific Chilean regions. Places like the central regions,  
25 the Atacama desert, and the Valdivian temperate forests present a proliferation of studies on soil Fungi,  
26 Bacteria, and nutrient cycling, reflecting historical interests of established research groups. Based on  
27 this research, we are identifying the causes of the data blind spots and invite the Chilean soil ecology  
28 community to propose ideas on how to fill them.

29

30 **Keywords:** continental Chile, distribution patterns, ecosystem functions, soil ecology, soil fauna.

## 31 **Introduction**

32 Soil is a highly diverse habitat which contains a plethora of very different organisms, ranging from  
33 bacteria and fungi, to nematodes, earthworms, and moles, among others. It is estimated that soil harbor  
34 up to a quarter of all living species on Earth, and that one gram of healthy garden soil may contain one  
35 billion of bacterial cells, up to one million individual fungi, about one million cells of protists, and  
36 several hundreds nematodes (European Commission 2010). Soil biodiversity is a main actor driving  
37 several ecosystem functions and services, including nutrient cycling, regulation, and plant acquisition,  
38 plant productivity, reduction of plant pathogens, control of antibiotic resistance genes, climate  
39 regulation, food production (Bardgett and van der Putten 2014; Delgado-Baquerizo et al. 2020), etc.

40 Despite its importance, soil biodiversity has historically and largely been neglected. But  
41 progress has been made in recent years, for example with the launching of the first global report on the  
42 *State of knowledge of soil biodiversity* (FAO et al. 2020), which included contributions of more than  
43 300 scientists worldwide. Nevertheless, one of the main questions in soil ecology still is how to  
44 causally relate soil biodiversity and ecosystem functioning at different spatiotemporal scales  
45 (Eisenhauer et al. 2017). Although over the last decade, global-scale studies have started to disentangle  
46 this causal relationship (Maestre et al. 2012, 2015; Pärtel et al. 2016; Delgado-Baquerizo et al. 2016,  
47 2017, 2020; Soliveres et al. 2016; Song et al. 2017; Crowther et al. 2019), there is much work to be  
48 done compared to aboveground ecosystems, where for example the relationships between plant  
49 community attributes and productivity are well established (Flynn et al. 2011; Grace et al. 2016; Liang  
50 et al. 2016; Duffy et al. 2017). Still, it is important to establish causal paths between soil microbial  
51 communities attributes and ecosystem functions/services (Xu et al. 2020). Hall et al. (2018) defines  
52 three categories of microbial communities attributes: microbial processes (ie. nitrogen fixation),  
53 microbial community properties (ie. biomass C:N ratio, functional gene abundance), and microbial  
54 membership (ie. taxonomic and phylogenetic diversity, community structure, co-occurrence networks).  
55 In this conceptualization, microbial processes more directly affect a nutrient pool or flux, while the  
56 effects of community properties and microbial membership are more indirect, mediated by their  
57 concatenate effect on microbial processes.

58 Over the last decade there is a paramount of global soil ecology studies focusing on bacteria  
59 (Delgado-Baquerizo et al. 2018; Cano-Díaz et al. 2020), protists (Singer et al. 2019; Oliverio et al.  
60 2020), fungi (Tedersoo et al. 2014; Egidi et al. 2019; Větrovský et al. 2020) including mycorrhizal  
61 fungi (Davison et al. 2015; Soudzilovskaia et al. 2015), invertebrates in general (Bastida et al. 2019),  
62 nematodes (van den Hoogen et al. 2019), earthworms (Briones and Schmidt 2017; Phillips et al. 2019),

63 isopods (Sfenthourakis and Hornung 2018), ants (Gibb et al. 2017; Bertelsmeier et al. 2017), termites  
64 (Buczowski and Bertelsmeier 2016), roots (Iversen et al. 2017), and the overall soil community  
65 (Fierer et al. 2009; Bahram et al. 2018; Cameron et al. 2019; Crowther et al. 2019; Delgado-Baquerizo  
66 et al. 2020; Guerra et al. 2020; Johnston and Sibly 2020; Luan et al. 2020). Despite these great  
67 advances in global soil ecology, major taxonomic, functional, geographic, and temporal gaps still exist  
68 (Bueno et al. 2017; Cameron et al. 2019; Guerra et al. 2020). Filling these gaps is crucial for soil  
69 biodiversity conservation and governance. Furthermore, and unlike aboveground biodiversity, there is  
70 no monitoring of soil biodiversity; thus, as much of global soil biodiversity is yet to be described, we  
71 do not even know at what pace are these unknown species being lost. There is urgent need for action.

72         Recently, when analyzing 17,186 sampling sites at a global scale (from macro-ecological scale  
73 studies) Guerra et al. (2020) found that just in 0.3% of those sites, both soil biodiversity and ecosystem  
74 functions were investigated at the same time. As both are so interdependent, much work needs to be  
75 done in order to integrate conceptually, causally, and disciplinary (regarding different knowledge areas)  
76 soil biodiversity and its associated ecosystem functions and services. Guerra et al. (2020) found a lack  
77 of conjoint studies of soil biodiversity and ecosystem functions at continental and global-scale studies,  
78 but, would the same happen at national, regional, or local scales? To find out, we conducted a similar  
79 analysis (searching Web of Science articles, extracting their coordinates, and assigning each site to the  
80 soil taxa and/or function investigated) restricted to the continental Chilean territory. Chile is the longest  
81 country in the World, and as such, it contains varied ecosystems: the driest desert (Atacama), high  
82 Andean ecosystems, Mediterranean climate areas, extremely rainy temperate forests, and Patagonian  
83 forests and steppe. There is plenty of interest in the soil microbial biodiversity of the country, reflected  
84 for example in the creation of The Chilean Network of Microbial Culture Collections (Santos et al.  
85 2016), or more specifically with the Atacama (microbiome) Database (Contador et al. 2020).

86         This study aimed to identify the information blind spots in soil taxa and ecosystem functions in  
87 the continental Chilean territory, analyzing their distribution patterns, as a base line for future  
88 monitoring and conservation initiatives.

89

## 90 **Materials and Methods**

### 91 **Literature search and coordinates extraction**

92 In January 2021, a Web of Science search of articles published between 1945 to 2020 was conducted  
93 focusing on 10 soil taxa (Bacteria, Fungi, Archaea, Oligochaeta, Acari, Collembola, Nematoda,  
94 Formicoidea, Protista, Rotifera) and four ecosystem functions (nutrient cycling, decomposition, water

95 infiltration, soil respiration) according to Guerra et al. (2020). The following keywords were used:  
96 (Chile\* OR Arica OR Parinacota OR Tarapacá OR Valparaíso OR O'Higgins OR Maule OR Ñuble OR  
97 Biobío OR Araucanía OR Aysén OR Magallanes OR Metropolitan OR Antofagasta OR (Northern AND  
98 Chile) OR (Central AND Chile) OR (Southern AND Chile) AND (soil\* OR belowground) AND  
99 (\*function\* OR \*diversity OR organism\* OR biota OR animal\* OR invert\* OR fauna\*) AND  
100 distribution AND (\*mycorrhizal\* OR microb\* OR nematodos\* OR bacteria\* OR ant\* OR fung\* OR  
101 invertebrate\* OR earthworm\* OR protist\* OR eukaryot\* OR collembola\* OR rotifer\* OR Archaea OR  
102 formic\* OR mite\* OR termite\* OR arthropod\* OR respiration OR decomposition OR nitrogen-cycling  
103 OR nutrient cycling OR water infiltration OR aggregate\* OR bioturbation).

104 This variety of keywords were used in order to capture the maximum number of published  
105 articles, which often used very different expressions when referring to the Chilean administrative  
106 regions, soil taxa, and ecosystem functions. Words like “Los Ríos” and “Los Lagos” referring to the  
107 administrative regions of Chile named that way, were excluded, as searching them leads to studies  
108 conducted in rivers and lakes. A second, more detailed search was necessary for focusing on specific  
109 geographic regions, soil, and the taxa or function of interest, using for example the following  
110 keywords: (Chile\* OR Arica OR Parinacota OR Tarapacá OR Valparaíso OR O'Higgins OR Maule OR  
111 Ñuble OR Biobío OR Araucanía OR Aysén OR Magallanes OR Metropolitan OR Antofagasta OR  
112 (Northern AND Chile) OR (Southern AND Chile) OR atacama) AND soil\* AND mycorrhizal\*).

113 Each article was checked individually, discarding those that did not imply soil extraction from  
114 continental Chile and that did not analyze at least one of the soil taxonomic groups or ecosystem  
115 functions defined. After compiling the articles, a database including coordinates (UTM system),  
116 citation, DOI identifier, and soil taxa and ecosystem function investigated was constructed in an Excel  
117 file, available at: <https://figshare.com/s/c7b6dce6b12edfbc5e7d> (DOI: 10.6084/m9.figshare.14838804).

118

### 119 **Spatial data processing and analyses**

120 Data was georeferenced using Qgis 3.6 (QGIS.org. 2021) to create three point layers projected in  
121 WGS84. These were used to elaborate 4 spatial distribution representation cartographies, also using a  
122 shape layer of regional administrative boundaries, extracted from the “Infraestructura de datos  
123 Geoespaciales de Chile (IDE)” database (<http://www.geoportal.cl/visorgeoportal/>) and a shape layer of  
124 ecoregions extracted from the RESOLVE Ecoregions dataset (<https://ecoregions.appspot.com/>).

125 The first cartography used three shape layers: the first one related to sampling sites dealing with  
126 soil biodiversity, the second one for sites dealing with soil ecosystem functions, and the third one for

127 sites dealing with both. For each layer, the parameters of points grouping (or cluster) were applied in  
128 Qgis 3.6 properties, assigning a tolerance distance of 50 km. For the second and third cartographies, the  
129 same tools and parameters were used, but applying 10 soil taxa shape layers (second cartography) and  
130 4 soil ecosystem function shape layers (third cartography). For the fourth cartography the same three  
131 shape layers from the first cartography were used. For each one, the Qgis 3.6 tool Heatmap (Core  
132 Density Estimation) was used, applying a 2 km radius to cover concentrations within that range. The  
133 color gradient was adapted to the design of previous cartographies, categorizing from a low density  
134 (only 1 point), to a high density meaning the existence of over 10 sampling points. The RESOLVE  
135 Ecoregions shape layer (for continental Chile) was superimposed in this fourth cartography. All  
136 cartographies were projected in WGS84 / EPSG: 4326.

137 To analyze the representativeness (percentage and no. of samples) of the 10 soil taxonomic  
138 groups and of the 4 ecosystem functions in the ecoregions, the ecoregions layer, the 10 taxonomic  
139 groups layers, and the 4 ecosystem function layers were transformed to raster files with a 2 km  
140 resolution, assuming each sample point equals one pixel. For the ecoregions layer, a value of 1 to 7 was  
141 assigned to each pixel depending on which ecoregion it corresponds to (ie. pixels with a value of 1  
142 correspond to the Atacama desert; pixels with a value of 2 correspond to the Central Andean dry puna).  
143 For point layers, a value of 10 was given to each point. Using a raster calculator, the values were  
144 processed by multiplying: Ecoregions raster \* Point layer raster for each taxon and function. The result  
145 was 10 raster layers for taxa and 4 raster layers for functions with values from 1 to 7 and 10 to 70.  
146 Following the same example: all values of 10 correspond to the sampling points located in the Atacama  
147 Desert, and all values of 20 correspond to the sampling points located in the Central Andean dry puna.  
148 Using the Unique values report raster tool, a report was obtained for each layer showing the number of  
149 pixels for each value. These data were extracted and arranged in four Excel tables: two referring to the  
150 number of pixels for taxa and functions, and the remaining referred to the percentage of  
151 representativeness of each taxa and function, according to each ecoregion.

152

## 153 **Results**

154 A total of 239 Web of Science articles were obtained for continental Chile, from which 111 deal with  
155 soil biodiversity, 89 deal with soil ecosystem functions, and 39 investigated both. From these articles,  
156 741 sampling points were obtained (Fig. 1), showing a greater number of soil biodiversity sites in the  
157 administrative regions of Antofagasta (north) and Los Ríos (south) (Fig. 1a) and centered on Bacteria  
158 and Fungi (Fig. S1). The Andean part of the Coquimbo region, and the regions of Aysén and

159 Magallanes showed the least soil biodiversity sampling points (Fig. 1a), while taxa like Formicoidea,  
 160 Protista, and Rotifera did not surpass five studies. The central zone of Chile, and the regions of  
 161 Antofagasta and Los Lagos showed a major number of soil ecosystem functions sites (Fig. 1b), with  
 162 nutrient cycling being the most studied function with 300 sampling sites, while the remaining functions  
 163 did not surpass 50 sampling sites (Fig. 1e). The La Araucanía region was the one where soil  
 164 biodiversity and ecosystem functions were most conjointly studied (Fig. 1c).

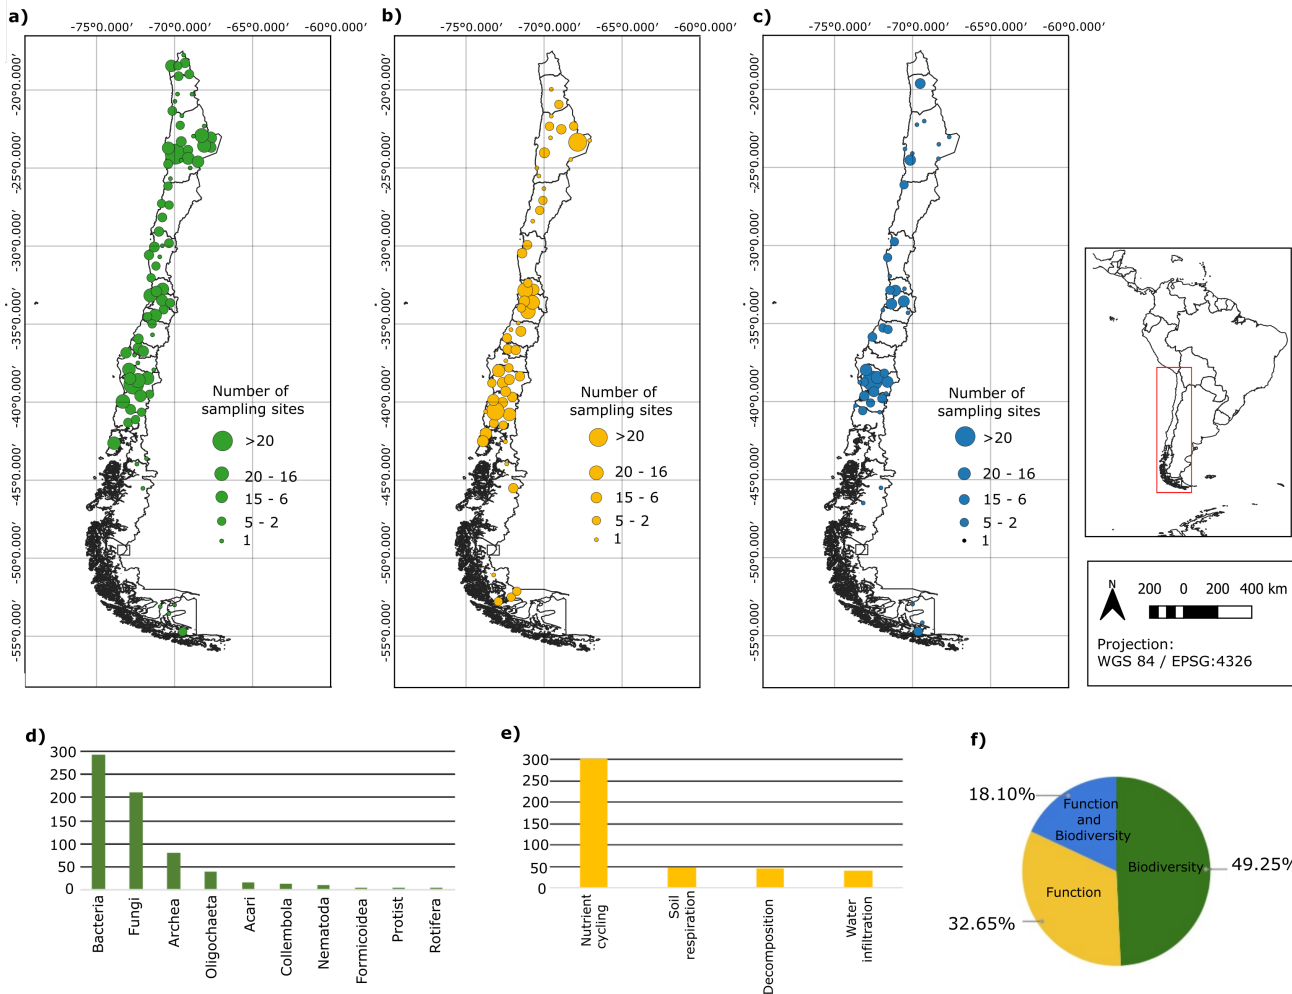

165 **Figure 1.** Distribution of sampling sites for soil taxa and ecosystem functions in continental Chile. **a.** Soil biodiversity  
 166 sampling sites. **b.** Soil ecosystem functions sampling sites. **c.** Sampling sites where both soil biodiversity and ecosystem  
 167 functions were conjointly studied. **d.** Number of sampling sites per soil taxa. **e.** Number of sampling sites per soil ecosystem  
 168 function. **f.** Percentages of sampling sites investigating soil biodiversity, ecosystem function, and both. The size of the  
 169 circles is based on a 50 km grid.

170

171 When doing a 2 km radius heatmap analysis, two hot spots in soil biodiversity sites were found:  
 172 one at the south of the Atacama desert and one in the Chilean Matorral (which is also a hot spot for soil



173 biodiversity and ecosystem functions when studied together; Fig. 2c), while some parts of the Central  
174 Andean dry puna presented medium density (Fig. 2a); this ecoregion also showed a hot spot for soil  
175 ecosystem functions sites (Fig. 2b). The Valdivian temperate forests had medium density regarding soil  
176 ecosystem functions sites (Fig. 2b). Ecoregions like the Magallanic subpolar forests and the Patagonian  
177 steppe had the highest sampling gaps (Fig. 2).

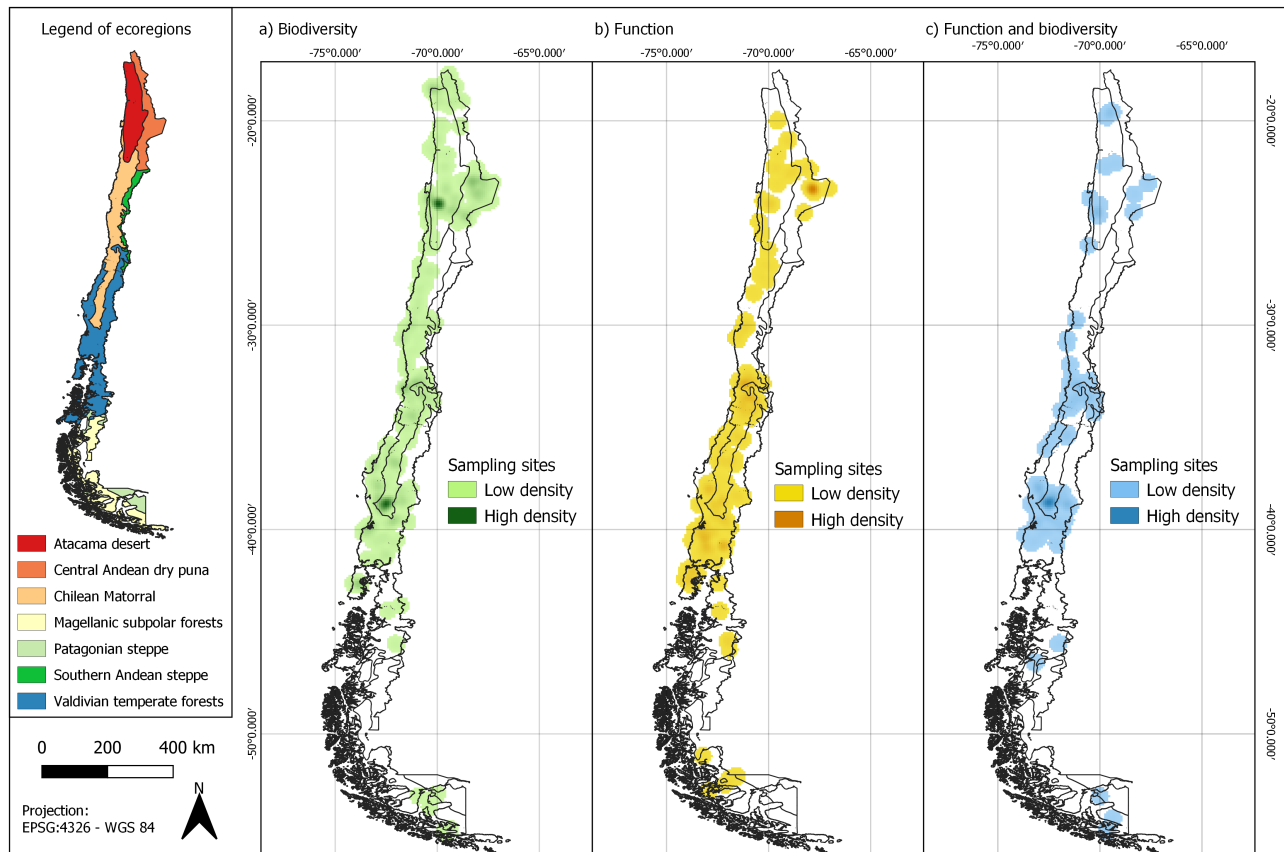

178 **Figure 2.** Heatmap of sampling distribution across continental Chile ecoregions (2 km grid). **a.** Soil biodiversity sampling  
179 sites. **b.** Soil ecosystem functions sampling sites. **c.** Soil biodiversity and ecosystem function sampling sites.

180

181 Regarding the representativeness of the 10 soil taxa and of the 4 ecosystem functions in the  
182 ecoregions, it was found that in all ecoregions, at least 5 soil taxonomic groups had a percentage  
183 coverage of less than 5% (Fig. 3a), with less than 10 sampling sites (Fig. 3b). For soil ecosystem  
184 functions, overall, a greater variability in percentage coverage (Fig. 3a) and number of sampling sites  
185 (Fig. 3b) was found. The number of sampling sites for soil ecosystem functions was generally low in at  
186 least five of the seven ecoregions, and did not surpass five sites for two ecosystem functions (Fig. 3b).  
187 Ecoregions like the Chilean Matorral and the Valdivian temperate forests had the highest soil  
188 ecosystem functions representativeness of number of sampling sites and coverage percentage (Fig. 3).



189 The Magellanic subpolar forests, the Patagonian steppe, and the Southern Andean steppe presented  
190 extremely low numbers of sampling sites (Fig. 3b).

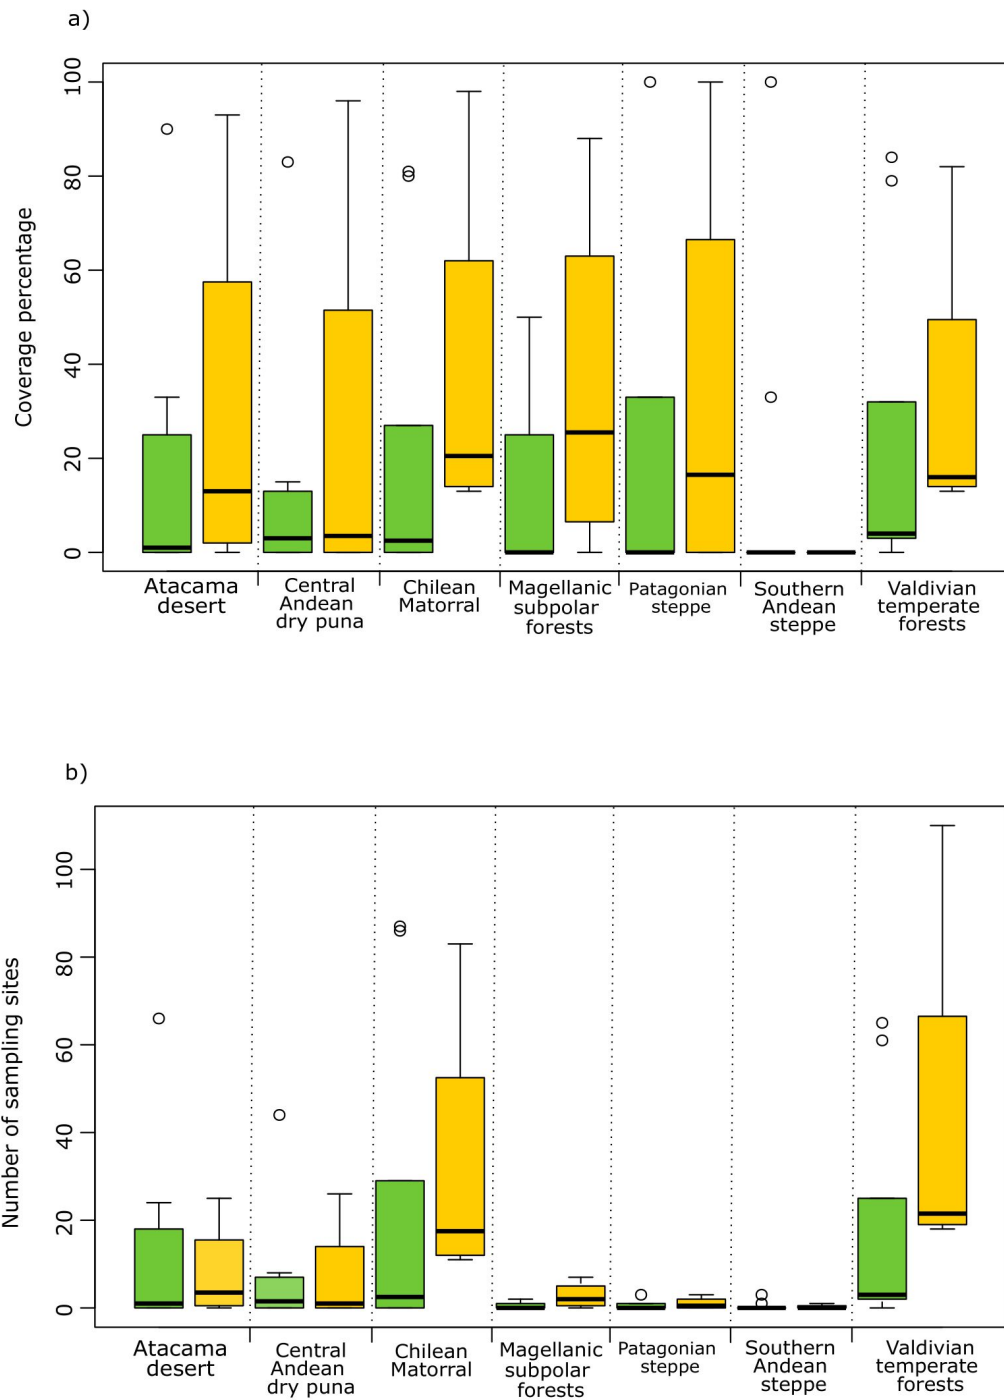

191 **Figure 3.** Representativeness of percentage coverage (a) and number of sampling sites (b) for soil biodiversity (green bars)  
192 and ecosystem functions (yellow) in the seven continental Chilean ecoregions.

193 Finally, historically there is an steady increase in Chilean studies dealing with soil biodiversity,  
194 ecosystem functions, and both (Fig. 4), especially during the last decade.

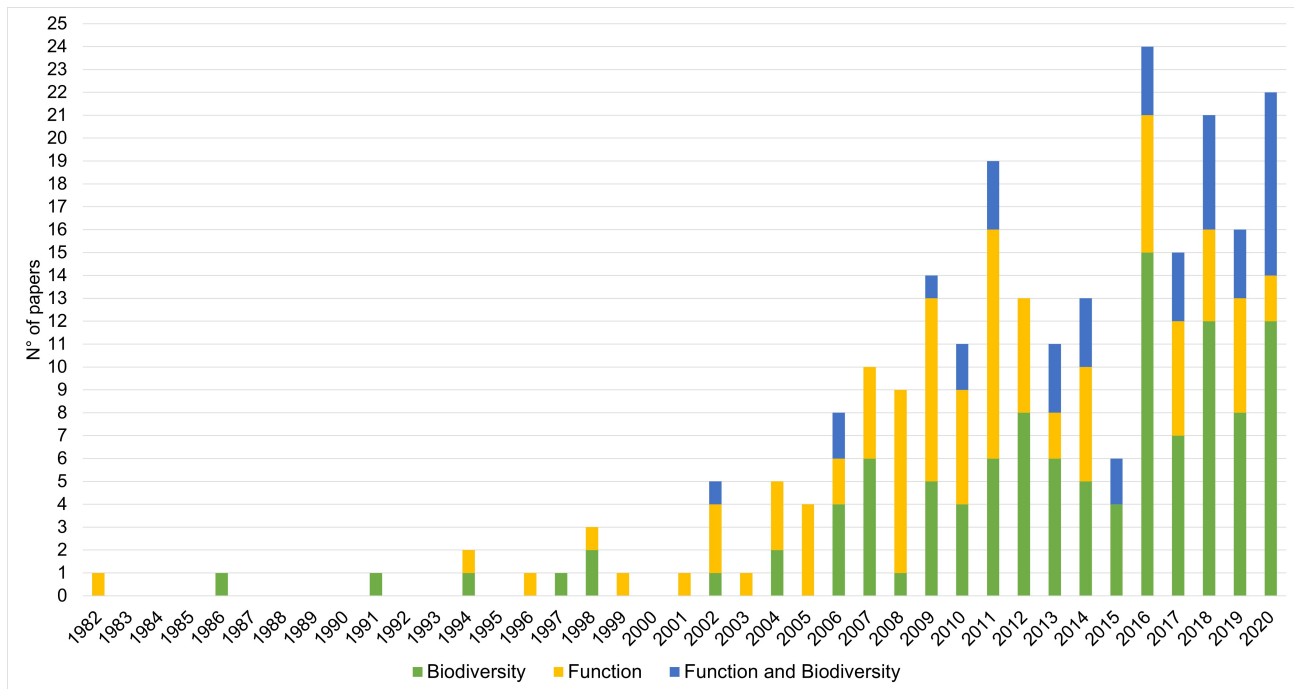

195 **Figure 4.** Number of Web of Science articles (N° of papers) published for continental Chile and dealing with soil  
196 biodiversity (green), ecosystem functions (yellow), and both investigated together (blue). The Web of Science search was  
197 for the period 1945-2020, but the first study appears in 1982.

198

## 199 Discussion

200 In our analyses of soil biodiversity and ecosystem function research in Chile we overall found several  
201 types of biases: geographic, towards the Atacama desert, the central zone of Chile, and the Valdivian  
202 temperate forests; taxonomic, towards Bacteria and Fungi; and functional, towards nutrient cycling.  
203 Over the last decades, the Atacama desert, given its extreme conditions, has attracted plenty of national  
204 and international researchers interested in studying the microbial life under such conditions. So much  
205 so, that an special issue on the microbiology of the Atacama desert was launched by the journal *Antonie  
206 van Leeuwenhoek* in 2018 (Bull et al. 2018). Dry tephra of Atacama volcanoes (above 6000 m.a.s.l.) is  
207 the closest thing to the surface of Mars, as these “soils” are extremely acidic, oligotrophic, and  
208 exposed to a thin atmosphere, high UV fluxes, and high temperate fluctuations (Schmidt et al. 2018).  
209 These conditions are perfect for the field of astrobiology, which also has proliferated in the Atacama  
210 desert. There are now important established Chilean research groups studying the Atacama soils  
211 microbial life. The central zone of Chile, around the Metropolitan and the Valparaíso regions,

212 concentrate most of the population (52%), the most traditional and prominent universities, and the most  
213 crop productive area. This partially could explain the concentration of sampling sites around that zone.  
214 Finally, there was also a significant number of sampling sites (for soil biodiversity, ecosystem  
215 functions, and both) around the regions of La Araucanía, Los Ríos, and Los Lagos, in the Valdivian  
216 temperate forests. This reflects an historical interest of established research groups over the last four  
217 decades, as well as international collaborations, mainly originating from the Austral University of Chile  
218 and from La Frontera University (Godoy and Mayr 1989; Rubio et al. 1990; Godoy and Marín 2019).

219 Some soil taxa like Acari, Collembola, Nematoda, Formicoidea, Protista, Rotifera where barely  
220 studied, represented by just a few sites concentrated in some administrative regions. We think several  
221 reasons could explain this: i) An historical lack of interest in such groups, as for example the  
222 established research groups mentioned above have focused in Bacteria (for the Atacama desert) and  
223 Fungi (for Valdivian temperate forests); ii) The difficulties that the sampling for some of those groups  
224 carry out; iii) The relatively simple methods for Bacteria, Fungi, and Archaea sampling from soil,  
225 especially over the last decade with next generation sequencing techniques; and iv) All of the above  
226 combined. This trend where soil Bacteria and Fungi are the most studied taxa is not unique to this study  
227 (Guerra et al. 2020), and besides reflecting the ubiquity of such taxa (Tedersoo et al. 2014; Delgado-  
228 Baquerizo et al. 2018; Egidi et al. 2019; Cano-Díaz et al. 2020; Větrovský et al. 2020), it also shows  
229 their central role in ecosystem functioning, as usually taught in soil ecology. Perhaps the other soil taxa  
230 should be more investigated to disentangle unknown relationships with ecosystem functions. Also, as  
231 “nutrient cycling” encompass a great number of processes, it is understandable that this was the soil  
232 ecosystem function with most sampling sites.

233 Ecoregions like the Magellanic subpolar forests, the Patagonian steppe, and the Southern  
234 Andean steppe are of extremely hard access, with few to any populated center and University or  
235 research center nearby. These regions presented very few sampling points for soil biodiversity and  
236 ecosystem functions in our study. Despite this, they are very interesting from an aboveground  
237 perspective, showing high plant richness (for the Magellanic subpolar forests; Rozzi et al. 2008) and  
238 complex biodiversity patterns across geographic zones and vegetation types (for the Patagonian steppe  
239 and the Southern Andean steppe; Peri et al. 2016). Ideally, all ecoregions of Chile in all their extension  
240 should have at least medium density of sampling sites dealing with soil biodiversity and ecosystem  
241 functions at the same time, which is far from being the case; thus, there is plenty of work to be done.

242 In the 2019 United Nations Climate Change Conference (COP 25), Chile (co-organizer)  
243 presented an unprecedented upgrade on the state of its biodiversity, particularly recommending

244 improving, strengthening, and implementing soil biodiversity monitoring programs, being soil one of  
245 the most vulnerable ecosystem components (Rojas et al. 2019). It was emphasized that an intensified  
246 soil use, inadequate agricultural practices, grazing, agro-forestry, and urbanization lead to well-known  
247 soil threats like erosion, pollution, acidification, nutrient leaching, salinization, loss of biodiversity and  
248 organic matter, among many others (Rojas et al. 2019). Also during COP 25, the main causes of native  
249 biodiversity loss were identified (for the period 1995-2016; Marquet et al. 2019): for the regions of  
250 Valparaíso, Metropolitan, O'Higgins, Los Lagos, and Magallanes it was the replacement of natural  
251 ecosystems for meadows and shrubs, previous to livestock and urbanization processes. For regions like  
252 Maule, Biobío, La Araucanía, and Los Ríos, the main cause of biodiversity loss was the replacement of  
253 native forests for commercial, fast-growing plantations (Marquet et al. 2019), like *Pinus radiata*, which  
254 retains high amounts of nitrogen, negatively affecting soil biodiversity (Oyarzún et al. 2007).

255 Now with a clearer picture of which are the geographic (all regions of Chile except for the  
256 central zone, and parts of the Atacama desert and the Valdivian temperate forests), taxonomic (all soil  
257 taxa except for Bacteria and Fungi, on the above-mentioned regions), and functional (all soil ecosystem  
258 functions except for nutrient cycling, on the above-mentioned regions) gaps of soil ecology in Chile,  
259 we can call for action. First, we need to feed the database constructed on this study, so if maybe some  
260 studies dealing with soil biodiversity and/or ecosystem functions in continental Chile were not  
261 included, please contact us. Second, as a Chilean soil ecology community there is a need for open data  
262 and open collaborations. Third, we need even more integration between the researchers investing soil  
263 biodiversity and those dealing with soil ecosystem functions. And fourth, we need specific legislation  
264 for soil biodiversity *per sé* (besides its importance for ecosystem functioning and food production), for  
265 conserving such biodiversity (Guerra et al. 2021); ideally, hot spots of belowground biodiversity could  
266 serve as a criteria for defining conservation areas.

267

## 268 **Acknowledgments**

269 Fondecyt No. 1190642 (ANID – Chile). To Carlos A. Guerra for helpful suggestions.

270

## 271 **References**

- 272 Bahram M, Hildebrand F, Forslund SK, Anderson JL, Soudzilovskaia NA, Bodegom PM, *et al.* 2018.  
273 Structure and function of the global topsoil microbiome. *Nature* 560: 233-237.
- 274 Bardgett RD, van der Putten WH. 2014. Belowground biodiversity and ecosystem functioning. *Nature*  
275 515: 505-511.

- 276 Bastida F, Eldridge DJ, Abades S, Alfaro FD, Gallardo A, García-Velázquez L, *et al.* 2020. Climatic  
277 vulnerabilities and ecological preferences of soil invertebrates across biomes. *Mol Ecol* 29: 752-761.
- 278 Bertelsmeier C, Ollier S, Liebhold A, Keller L. 2017. Recent human history governs global ant  
279 invasion dynamics. *Nat Ecol Evol* 1: 0184.
- 280 Briones MJJ, Schmidt O. 2017. Conventional tillage decreases the abundance and biomass of  
281 earthworms and alters their community structure in a global meta-analysis. *Glob Change Biol* 23:  
282 4396-4419.
- 283 Buczowski G, Bertelsmeier C. 2017. Invasive termites in a changing climate: A global perspective.  
284 *Ecol Evol* 7: 974-985.
- 285 Bueno CG, Marín C, Silva-Flores P, Aguilera P, Godoy R. 2017. Think globally, research locally:  
286 contrasting patterns of mycorrhizal symbiosis in South America. *New Phytol* 215: 1306-1309.
- 287 Bull AT, Andrews BA, Dorador C, Goodfellow M. 2018. Preface. *Antonie van Leeuwenhoek* 111:  
288 1267.
- 289 Cano-Díaz C, Maestre FT, Eldridge DJ, Singh BK, Bardgett RD, Fierer N, Delgado-Baquerizo M.  
290 2020. Contrasting environmental preferences of photosynthetic and non-photosynthetic soil  
291 cyanobacteria across the globe. *Glob Ecol Biogeogr* 29: 2025-2038.
- 292 Cameron EK, Martins IS, Lavelle P, Mathieu J, Tedersoo L, Bahram M, *et al.* 2019. Global mismatches  
293 in aboveground and belowground biodiversity. *Conserv Biol* 33: 1187-1192.
- 294 Contador CA, Veas-Castillo L, Tapia E, Antipán M, Miranda N, Ruiz-Tagle B, *et al.* 2020. Atacama  
295 Database: a platform of the microbiome of the Atacama Desert. *Antonie van Leeuwenhoek* 113: 185-  
296 195.
- 297 Crowther TW, van den Hoogen J, Wan J, Mayes MA, Keiser AD, Mo L, *et al.* 2019. The global soil  
298 community and its influence on biogeochemistry. *Science* 365: eaav0550.
- 299 Davison J, Moora M, Öpik M, Adholeya A, Ainsaar L, Bâ A, *et al.* 2015. Global assessment of  
300 arbuscular mycorrhizal fungus diversity reveals very low endemism. *Science* 349: 970-973.
- 301 Delgado-Baquerizo M, Maestre FT, Reich PB, Jeffries TC, Gaitan JJ, Encinar D, *et al.* 2016. Microbial  
302 diversity drives multifunctionality in terrestrial ecosystems. *Nature Commun* 7: 10541.
- 303 Delgado-Baquerizo M, Bissett A, Eldridge DJ, Maestre FT, He JZ, Wang JT, *et al.* 2017. Palaeoclimate  
304 explains a unique proportion of the global variation in soil bacterial communities. *Nat Ecol Evol* 1:  
305 1339-1347.
- 306 Delgado-Baquerizo M, Oliverio AM, Brewer TE, Benavent-González A, Eldridge DJ, Bardgett RD, *et*  
307 *al.* 2018. A global atlas of the dominant bacteria found in soil. *Science* 359: 320-325.

- 308 Delgado-Baquerizo M, Reich PB, Trivedi C, Eldridge DJ, Abades S, Alfaro FD, *et al.* 2020. Multiple  
309 elements of soil biodiversity drive ecosystem functions across biomes. *Nat Ecol Evol* 4: 210-220.
- 310 Duffy JE, Godwin CM, Cardinale BJ. 2017. Biodiversity effects in the wild are common and as strong  
311 as key drivers of productivity. *Nature* 549: 261-264.
- 312 Egidi E, Delgado-Baquerizo M, Plett JM, Wang J, Eldridge DJ, Bardgett RD, *et al.* 2019. A few  
313 Ascomycota taxa dominate soil fungal communities worldwide. *Nat Commun* 10: 2369.
- 314 Eisenhauer N, Antunes PM, Bennett AE, Birkhofer K, Bissett A, Bowker MA, *et al.* 2017. Priorities for  
315 research in soil ecology. *Pedobiologia* 63: 1-7.
- 316 European Commission. 2010. *The Factory of Life – Why Soil Biodiversity is so Important*. Office for  
317 Official Publications of the European Communities, Luxembourg.
- 318 FAO, ITPS, GSBI, SCBD, EC. 2020. *State of knowledge of soil biodiversity – Status, challenges and*  
319 *potentialities, Report 2020*. Rome, FAO. DOI: <https://doi.org/10.4060/cb1928en>
- 320 Fierer N, Strickland MS, Liptzin D, Bradford MA, Cleveland CC. 2009. Global patterns in  
321 belowground communities. *Ecol Lett* 12: 1238-1249.
- 322 Flynn DF, Mirotchnick N, Jain M, Palmer MI, Naeem S. 2011. Functional and phylogenetic diversity  
323 as predictors of biodiversity–ecosystem-function relationships. *Ecology* 92: 1573-1581.
- 324 Gibb H, Dunn RR, Sanders NJ, Grossman BF, Photakis M, Abril S, *et al.* 2017. A global database of  
325 ant species abundances. *Ecology* 98: 883-884.
- 326 Grace JB, Anderson TM, Seabloom EW, Borer ET, Adler PB, Harpole WS, *et al.* 2016. Integrative  
327 modelling reveals mechanisms linking productivity and plant species richness. *Nature* 529: 390-393.
- 328 Godoy R, Mayr R. 1989. Caracterización morfológica de micorrizas vesículo-arbusculares en coníferas  
329 endémicas del sur de Chile. *Bosque* 10: 89-98.
- 330 Godoy R, Marín C. 2019. Mycorrhizal studies in temperate rainforests of Southern Chile. In: Pagano  
331 M, Lugo M (eds) *Mycorrhizal Fungi in South America*. Springer, pp. 315-341.
- 332 Guerra CA, Heintz-Buschart A, Sikorski J, Chatzinotas A, Guerrero-Ramírez N, Cesarz S, *et al.* 2020.  
333 Blind spots in global soil biodiversity and ecosystem function research. *Nat Commun* 11: 3870.
- 334 Guerra CA, Bardgett RD, Caon L, Crowther TW, Delgado-Baquerizo M, Montanarella L, *et al.* 2021.  
335 Tracking, targeting, and conserving soil biodiversity. *Science* 371: 239-241.
- 336 Hall EK, Bernhardt ES, Bier RL, Bradford MA, Boot CM, Cotner JB, *et al.* 2018. Understanding how  
337 microbiomes influence the systems they inhabit. *Nat Microbiol* 3: 977-982.
- 338 Iversen CM, McCormack ML, Powell AS, Blackwood CB, Freschet GT, Kattge J, *et al.* 2017. A global  
339 Fine-Root Ecology Database to address below-ground challenges in plant ecology. *New Phytol* 215:

- 340 15-26.
- 341 Johnston AS, Sibly RM. 2020. Multiple environmental controls explain global patterns in soil animal  
342 communities. *Oecologia* 192: 1047-1056.
- 343 Liang J, Crowther TW, Picard N, Wiser S, Zhou M, Alberti G, *et al.* 2016. Positive biodiversity-  
344 productivity relationship predominant in global forests. *Science* 354: aaf8957.
- 345 Luan L, Jiang Y, Cheng M, Dini-Andreote F, Sui Y, Xu Q, *et al.* 2020. Organism body size structures  
346 the soil microbial and nematode community assembly at a continental and global scale. *Nature*  
347 *Commun* 11: 6406.
- 348 Maestre FT, Quero JL, Gotelli NJ, Escudero A, Ochoa V, Delgado-Baquerizo M, *et al.* 2012. Plant  
349 species richness and ecosystem multifunctionality in global drylands. *Science* 335: 214-218.
- 350 Maestre FT, Delgado-Baquerizo M, Jeffries TC, Eldridge DJ, Ochoa V, Gozalo B, *et al.* 2015.  
351 Increasing aridity reduces soil microbial diversity and abundance in global drylands. *Proc Natl Acad*  
352 *Sci USA* 112: 15684-15689.
- 353 Marquet P, Altamirano M, Arroyo M, Fernández M, Gelcich S, Górski K, *et al.* 2019. *Biodiversidad y*  
354 *cambio climático en Chile: Evidencia científica para la toma de decisiones*. Informe de la mesa de  
355 Biodiversidad. Santiago: Comité Científico COP25; Ministerio de Ciencia, Tecnología, Conocimiento e  
356 Innovación.
- 357 Oliverio AM, Geisen S, Delgado-Baquerizo M, Maestre FT, Turner BL, Fierer N. 2020. The global-  
358 scale distributions of soil protists and their contributions to belowground systems. *Sci Adv* 6: eaax8787.
- 359 Oyarzún C, Aracena C, Rutherford P, Godoy R, Deschrijver A. 2007. Effect of land use conversion  
360 from native forests to exotic plantations on streamwater quality in southern Chile. *Water Air Soil Pollut*  
361 179: 341-350.
- 362 Pärtel M, Bennett JA, Zobel M. 2016. Macroecology of biodiversity: disentangling local and regional  
363 effects. *New Phytol* 211: 404-410.
- 364 Peri PL, Lencinas MV, Bousson J, Lasagno R, Soler R, Bahamonde H, Pastur GM. 2016. Biodiversity  
365 and ecological long-term plots in Southern Patagonia to support sustainable land management: The  
366 case of PEBANPA network. *J Nat Conserv* 34: 51-64.
- 367 Phillips HR, Guerra CA, Bartz ML, Briones MJ, Brown G, Crowther TW, *et al.* 2019. Global  
368 distribution of earthworm diversity. *Science* 366: 480-485.
- 369 QGIS.org. 2021. QGIS Geographic Information System. QGIS Association. <http://www.qgis.org>
- 370 Santos C, Durán P, Tortela G, Barrientos L, Briceño G, Rodríguez R, *et al.* 2016. The Chilean Network  
371 of Microbial Culture Collections: Establishment and Operation. *Bol Micol* 31: 44-50.



- 372 Rubio R, Moraga E, Borie F. 1990. Acid phosphatase activity and vesicular-arbuscular mycorrhizal  
373 infection associated with roots of four wheat cultivars. *J Plant Nutr* 13: 585-598.
- 374 Rojas M, Aldunce L, Farías H, González P, Marquet J, Muñoz R, *et al.* 2019. *Evidencia científica y*  
375 *cambio climático en Chile: Resumen para tomadores de decisiones*. (Comité Científico COP25).  
376 Santiago: Ministerio de Ciencia, Tecnología, Conocimiento e Innovación.
- 377 Rozzi R, Armesto JJ, Goffinet B, Buck W, Massardo F, Silander J, *et al.* 2008. Changing lenses to  
378 assess biodiversity: patterns of species richness in sub-Antarctic plants and implications for global  
379 conservation. *Front Ecol Environ* 6: 131-137.
- 380 Schmidt SK, Gendron EMS, Vincent K, Solon AJ, Sommers P, Schubert ZR, *et al.* 2018. Life at  
381 extreme elevations on Atacama volcanoes: the closest thing to Mars on Earth?. *Antonie van*  
382 *Leeuwenhoek* 111: 1389-1401.
- 383 Singer D, Mitchell EA, Payne RJ, Blandenier Q, Duckert C, Fernández LD, *et al.* 2019. Dispersal  
384 limitations and historical factors determine the biogeography of specialized terrestrial protists. *Mol*  
385 *Ecol* 28: 3089-3100.
- 386 Soliveres S, van der Plas F, Manning P, Prati D, Gossner MM, Renner SC, *et al.* 2016. Biodiversity at  
387 multiple trophic levels is needed for ecosystem multifunctionality. *Nature* 536: 456-459.
- 388 Song D, Pan K, Tariq A, Sun F, Li Z, Sun X, *et al.* 2017. Large-scale patterns of distribution and  
389 diversity of terrestrial nematodes. *Appl Soil Ecol* 114: 161-169.
- 390 Soudzilovskaia NA, Douma JC, Akhmetzhanova AA, van Bodegom PM, Cornwell WK, Moens EJ, *et*  
391 *al.* 2015. Global patterns of plant root colonization intensity by mycorrhizal fungi explained by climate  
392 and soil chemistry. *Global Ecol Biogeogr* 24: 371-382.
- 393 Sfenthourakis S, Hornung E. 2018. Isopod distribution and climate change. *ZooKeys* 801: 25-61.
- 394 Tedersoo L, Bahram M, Pöhlme S, Kõljalg U, Yorou NS, Wijesundera R, *et al.* 2014. Global diversity  
395 and geography of soil fungi. *Science* 346: 1256688.
- 396 Van den Hoogen J, Geisen S, Routh D, Ferris H, Traunspurger W, Wardle DA, *et al.* 2019. Soil  
397 nematode abundance and functional group composition at a global scale. *Nature* 572: 194-198.
- 398 Větrovský T, Morais D, Kohout P, Lepinay C, Algora C, Hollá SA, *et al.* 2020. GlobalFungi, a global  
399 database of fungal occurrences from high-throughput-sequencing metabarcoding studies. *Sci Data* 7:  
400 228.
- 401 Xu X, Wang N, Lipson D, Sinsabaugh R, Schimel J, He L, *et al.* 2020. Microbial macroecology: In  
402 search of mechanisms governing microbial biogeographic patterns. *Global Ecol Biogeogr* 29: 1870-  
403 1886.

404

## SUPPLEMENTAL FIGURES

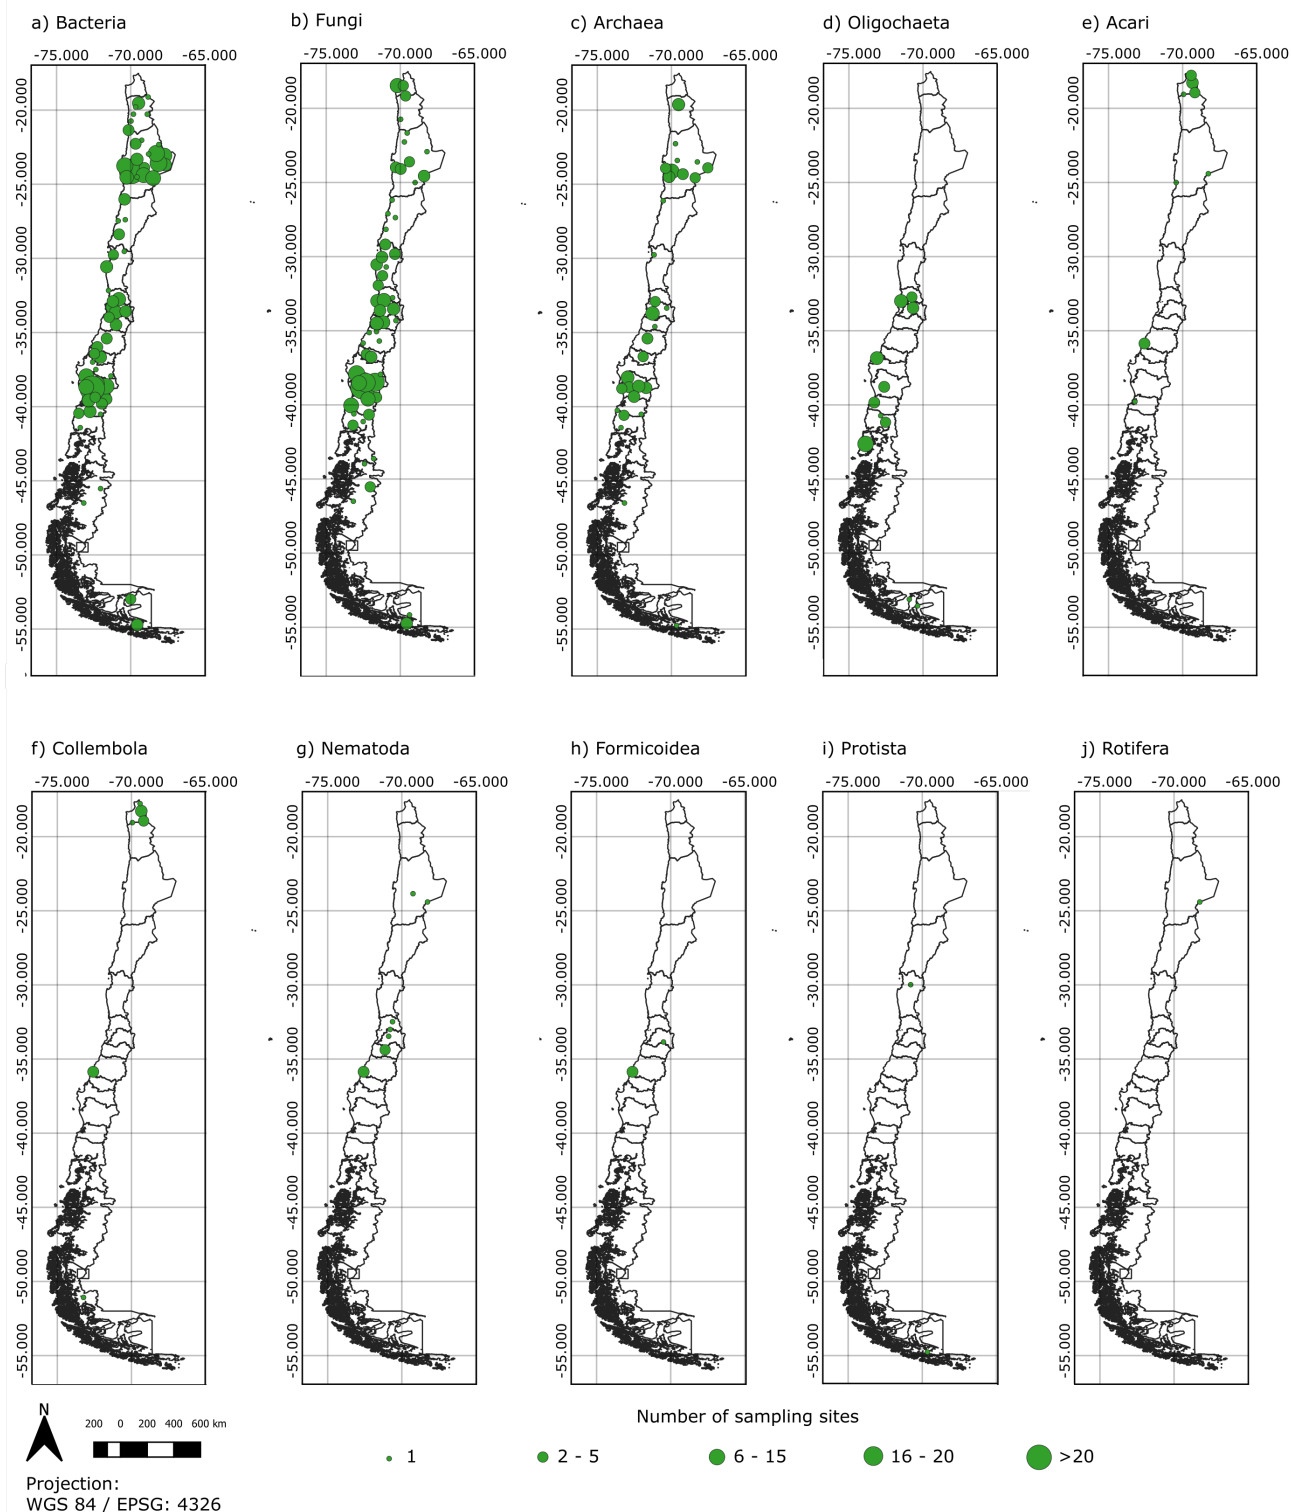

405 **Figure S1.** Distribution of the 10 soil taxonomic groups in continental Chile. **a.** Bacteria. **b.** Fungi. **c.** Archaea. **d.**  
406 Oligochaeta. **e.** Acari. **f.** Collembola. **g.** Nematoda. **h.** Formicoidea. **i.** Protista. **j.** Rotifera. The size of the circles is based on  
407 a 50 km grid.

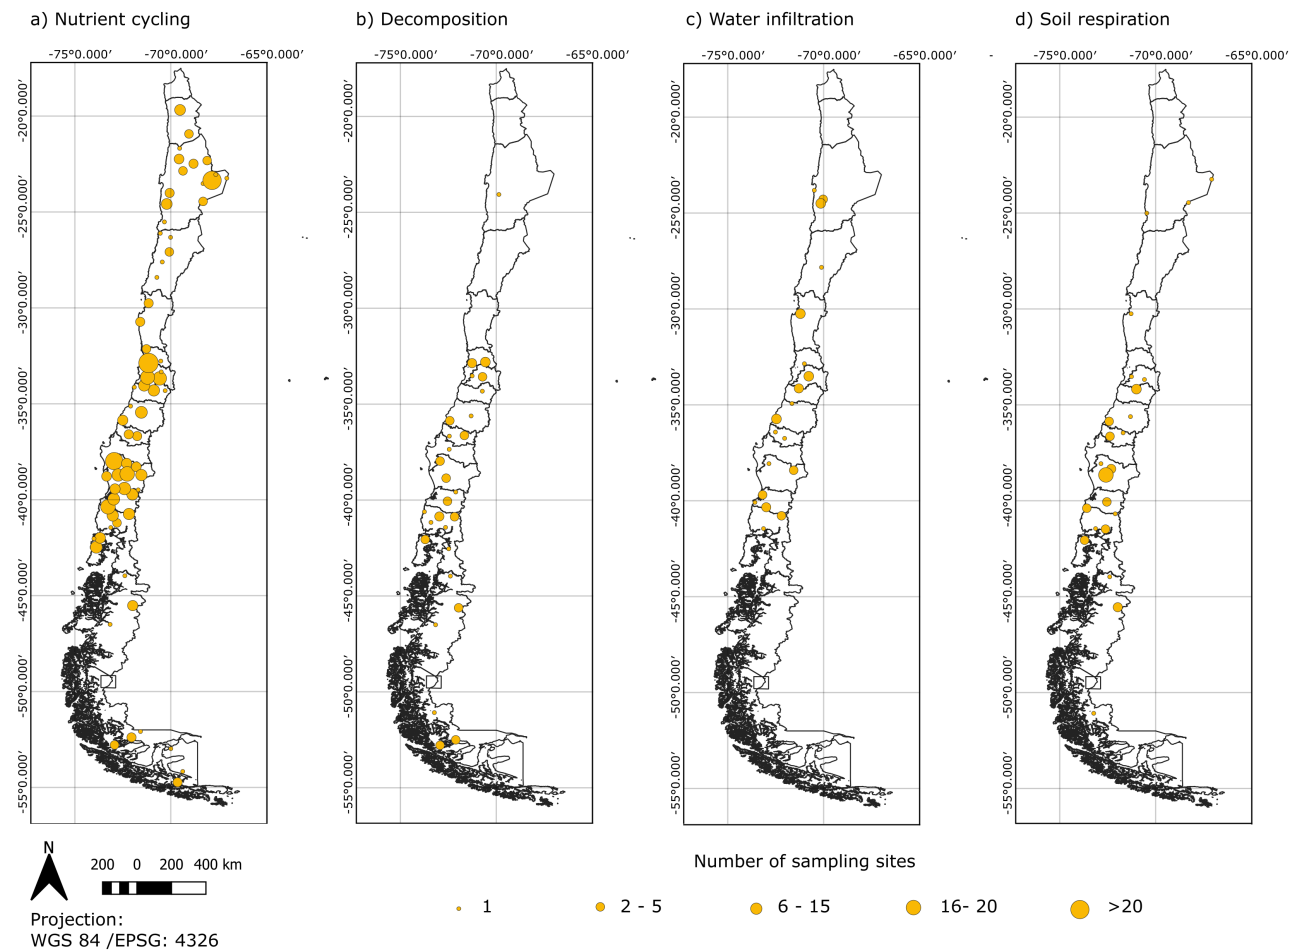

408 **Figure S2.** Distribution of the four soil ecosystem functions in continental Chile. **a.** Nutrient cycling. **b.** Decomposition. **c.**  
409 Water infiltration. **d.** Soil respiration. The size of the circles is based on a 50 km grid.
